# Supplementary material for: Cytoplasmic poly(A) binding protein-1 binds to genomically encoded sequences within mammalian mRNAs
Source: PubMed Central journal article supplement — RNA. 2016 Jan;22(1):61–74. doi: 10.1261/rna.053447.115 (PMC4691835; doi:10.1261/rna.053447.115), 2016-01
Supplement: supp_053447.115_Supplemental_Data.pdf [file supp_053447.115_Supplemental_Data.pdf]

### C1-5'-UTR<sup>\*</sup>

AGATCTAGATCTccccttctccccggcggttagtgctgagagtgcgagtggtgtgctccgggctcggaacacacattattatta  
aaaaatccaaaaaaaaatctaaaaatccttgaaaaacccaaaaaaatttcaaaaaaatccgctctccccgcccggagact  
ttttttttctctctttataaaaaaacccggtgaagcagccgagaccgaccgcccggcccggccccgagctccaagcaggaa  
cccagagaccgaggccttctgcccggaccagcaccgcccagcctcgctccccggttccacggccgttgagtacgctcgat  
tccggtgaattttgcccctgctgctgccccgctccccccccggctccgctccccggccccgactcgtctcctctcacgg  
gaaaggtcgcggcctgcccggcccgaggccgtgcccagGCTAGCGCTAGC

#### Mut 1

AGATCTAGATCTccccttctccccggcggttagtgctgagagtgcgagtggtgtgctccgggctcggaagccggagactttat  
ttttttctcctctttataaaaaataaccggtgaagcagccgagaccgaccgcccggcccggccccgagctccaagcaggaacc  
cagagaccgaggccttctgcccggaccagcaccgcccagcctcgctccccggttccacggccgttgagtacgctcgattc  
cgggtgaattttgcccctgctgctgccccgctccccccccggctccgctccccggccccgactcgtctcctctcacggga  
aaggtcgcggcctgcccggcccgaggccgtgcccagGCTAGCGCTAGC

#### Mut 2

AGATCTAGATCTccccttctccccggcggttagtgctgagagtgcgagtggtgtgctccgggctcggaacacacattattatta  
aaaaatccaaaaaaaaatctaaaaatccttgaaaaacccaaaaaaatttcaaaaaaatccgctctccccgcccggagacc  
ccggtgaagcagccgagaccgaccgcccggcccggccccgagctccaagcaggaaccagagaccgaggccttctgccc  
gccccgaccagcaccgcccagcctcgctccccggttccacggccgttgagtacgctcgattccggtgaattttgcccctgctgctg  
gccccgctccccccccggctccgctccccggccccgactcgtctcctctcacgggaaaggtcgcggcctgcccggccccg  
ccggcagccgtgcccagGCTAGCGCTAGC

#### Mut 3

AGATCTAGATCTccccttctccccggcggttagtgctgagagtgcgagtggtgtgctccgggctcggaaccggtgaagca  
gccgagaccgaccgcccggcccggccccgagctccaagcaggaaccagagaccgaggccttctgcccggccgaccga  
gcaccgcccagcctcgctccccggttccacggccgttgagtacgctcgattccggtgaattttgcccctgctgctgccccgctccc  
ctcccccggtccgctccccggccccgactcgtctcctctcacgggaaaggtcgcggcctgcccggccccgaggccgt  
gccgagGCTAGCGCTAGC

\* Yellow and Green highlight denote 5' and 3' cluster respectively. One or both these clusters are deleted in Mut 1, Mut 2 and Mut 3.

---

AGATCTAGATCT: BglIII restriction site used to clone 5 UTR and mutants into firefly luciferase vector.

GCTAGCGCTAGC: NheI restriction site used to clone 5 UTRs and mutants into firefly luciferase vector.

---

**Ccnd2 5'-UTR**<sup>\*\*</sup>

AGATCTAGATCTtgctgagcgcgagagaggagagcgcgagctgaggagagccgggcagttcggaggggaaggaccggtgcg  
agtcaggcggcccttgaggctccgctcgccaccttccactcttctctctctccctctctctttgccatttcttctctcccaatctcc  
cattcagccaaaggaaggaggttaaggaagcactccccgaccccccgacc**tccaaaaaataataataaaaaaaaaattta**  
**cagtcgggaccg**agtgggtggccggtggctGCTAGCGCTAGC

**CCND2-Mut**

AGATCTAGATCTtgctgagcgcgagagaggagagcgcgagctgaggagagccgggcagttcggaggggaaggaccggtgcg  
agtcaggcggcccttgaggctccgctcgccaccttccactcttctctctctccctctctctttgccatttcttctctcccaatctcc  
cattcagccaaaggaaggaggttaaggaagcactccccgaccccccgaccagtggtggccggtggctGCTAGCGCTA  
GC

\*\* Yellow highlight denote identifies region of PABPC1cluster within the 5' UTR of Ccnd2 mRNA. This region is deleted in Ccnd2-Mut.

---

**Safb 5'-UTR**<sup>\*\*\*</sup>

AGATCTAGATCTagtgtcgaggtgctgcctccggggaggctgaagcggttccctctcaggcggcgccattttgtgtaagagg  
gccgag**attcaaaaaataataataacaatacaaaaaaaa**acacactcacgcaaaccactgacccggttctgtgtgaag  
tggcgacggaaccaggggtccctggaGCTAGCGCTAGC

**Safb-Mut**

AGATCTAGATCTagtgtcgaggtgctgcctccggggaggctgaagcggttccctctcaggcggcgccattttgtgtaagagg  
gccgagcccactgacccggttctgtgtgaagtggcgacggaaccaggggtccctggaGCTAGCGCTAGC

\*\*\* Yellow highlight denote identifies region of PABPC1cluster within the 5' UTR of Safb mRNA. This region is deleted in Safb-Mut.

---

\*\*\*\*  
**Amd1 5'-UTR**

AGATCTAGATCTtcgcttacacagtatggccggcgacattagctagcgctcgctcaactctcctaacgggaaagcagcggac  
tacaagagactgaactgtatctgcctctattccaacagactcacgttcaacttcgctcacgaaaatagccggg~~aaaatttattagtc  
cttttttaaaaaaaaaagttaatataaaaattatagcaaaaaaaaaaaaaaaaa~~ggaacctgaacttagtaacacagctggaacaatc  
cgcagcggcggcaggagcggcgggagaagagatttaatttagttgattttctgtggtggtggtgctagctcacgggtgGCTAG  
CGCTAGC

**Amd1-Mut**

AGATCTAGATCTtcgcttacacagtatggccggcgacattagctagcgctcgctcaactctcctaacgggaaagcagcggac  
tacaagagactgaactgtatctgcctctattccaacagactcacgttcaacttcgctcacgaaaatagccgggggaacctgaacttta  
gtaacacagctggaacaatccgcagcggcggcaggagcggcgggagaagagatttaatttagttgattttctgtggtggtggtgctg  
ctagctcacgggtgGCTAGCGCTAGC

\*\*\*\* Yellow highlight denote identifies region of PABPC1cluster within the 5' UTR of Amd1 mRNA. This region is deleted in Amd1-Mut.

---
